# Supplementary material for: A noninferiority trial evaluating the efficacy of bedinvetmab compared to grapiprant for osteoarthritis-pain in dogs using force plate gait analysis
Source: Research Square preprint supplement (doi:10.21203/rs.3.rs-7303674/v1), 2025-09-17
Supplement: Supplementary file 1 [file 9a24e9e9ac544f1f7c449d64.docx]

Supplementary file 1. Mean ± SD (range) of each outcome measure at each timepoint

| Time point | Group | n | Lameness Index | CBPI PSS | CBPI PIS | CBPI QOL |
| --- | --- | --- | --- | --- | --- | --- |
| Screen | Bedinvetmab | 16 | 1.7 ± 0.6 (1.0, 2.6) | 4.1 ± 1.8 (1.8, 6.8) | 4.5 ± 2.4 (1.8, 8.5) | 3.6 ± 0.6 (3, 5) |
|  | Grapiprant | 16 | 1.9 ± 0.6 (0.8, 3.0) | 3.5 ± 1.6 (0.8, 5.8) | 4.5 ± 2.2 (1.0, 8.3) | 3.9 ± 0.8 (3, 5) |
| Day 0 | Bedinvetmab | 16 | 1.9 ± 0.6 (1.0, 3.0) | 4.0 ± 1.9 (0.8, 7.3) | 4.4 ± 2.4 (0.5, 8.0) | 3.3 ± 0.6 (2, 4) |
|  | Grapiprant | 16 | 1.8 ± 0.6 (0.8, 3.0) | 3.3 ± 1.7 (1.0, 5.8) | 3.8 ± 2.0 (0.8, 7.3) | 3.8 ± 0.8 (2, 5) |
| Day 14 | Bedinvetmab | 16 | 1.3 ± 0.5 (0.6, 2.0) | 2.5 ± 1.7 (0, 6.8) | 2.5 ± 1.9 (0.3, 7.3) | 3.9 ± 0.6 (3, 5) |
|  | Grapiprant | 15 | 1.4 ± 0.5 (0.6, 2.0) | 2.4 ± 1.3 (0.5, 5.3) | 2.6 ± 1.8 (0.8, 6.2) | 4.1 ± 0.6 (3, 5) |
| Day 28 | Bedinvetmab | 16 | 1.1 ± 0.4 (0.4, 2.0) | 2.2 ± 1.6 (0.3, 5.8) | 1.8 ± 1.4 (0.2, 5) | 4.3 ± 0.5 (4, 5) |
|  | Grapiprant | 16 | 1.2 ± 0.5 (0, 2.0) | 1.9 ± 1.4 (0, 4.5) | 2.2 ± 1.7 (0, 5.7) | 4.0 ± 0.5 (3, 5) |
| Day 42 | Bedinvetmab | 16 | 1.0 ± 0.6 (0, 2.4) | 2.0 ± 1.7 (0, 6.0) | 1.8 ± 1.7 (0, 6.7) | 4.3 ± 0.7 (3, 5) |
|  | Grapiprant | 16 | 1.2 ± 0.6 (0, 2.2) | 1.8 ± 1.6 (0, 4.5) | 2.0 ± 1.9 (0.2, 5.7) | 4.1 ± 0.6 (3, 5) |
| Day 56 | Bedinvetmab | 15 | 0.9 ± 0.6 (0.2, 2.4) | 1.5 ± 1.5 (0, 6.0) | 1.4 ± 1.8 (0, 7.3) | 4.2 ± 0.8 (3, 5) |
|  | Grapiprant | 14 | 1.1 ± 0.7 (0, 2.4) | 1.7 ± 1.5 (0, 4.3) | 2.1± 2.0 (0.2, 6) | 4.4 ± 0.5 (4, 5) |

| Time point | Group | n | CSOM | SNoRE 2.0 | SNoRE 3.0 | Joint pain |
| --- | --- | --- | --- | --- | --- | --- |
| Screen | Bedinvetmab | 16 | 6.0 ± 2.1 (3, 10) | 4.6 ± 2.3 (1.8, 8.6) | 2.9 ± 1.9 (1.2, 7) | 2.3 ± 0.6 (1, 3) |
|  | Grapiprant | 16 | 6.1 ± 2.0 (2, 9) | 4.4 ± 2.0 (1.4, 8.4) | 2.1 ± 1.2 (1.0, 5.5) | 2.2 ± 0.8 (1, 3) |
| Day 0 | Bedinvetmab | 16 | 5.9 ± 2.4 (0, 11) | 4.4 ± 2.5 (1.4, 8.6) | 2.9 ± 2.0 (1.0, 7.3) | 2.7 ± 0.7 (1, 4) |
|  | Grapiprant | 16 | 5.9 ± 2.1 (2, 10) | 3.8 ± 1.7 (1.4, 7.2) | 1.8 ± 0.8 (1.0, 4.0) | 2.6 ± 0.6 (2, 4) |
| Day 14 | Bedinvetmab | 16 | 4.1 ± 1.8 (1, 7) | 3.2 ± 2.2 (1, 7.8) | 2.0 ± 1.7 (1.0, 7.7) | 2.4 ± 0.6 (1, 3) |
|  | Grapiprant | 15 | 4.5 ± 1.7 (2, 8) | 3.0 ± 1.2 (1.6, 5.6) | 1.6 ± 0.5 (1.0, 2.8) | 2.3 ± 0.8 (1, 3) |
| Day 28 | Bedinvetmab | 16 | 3.1 ± 2.0 (0, 7) | 2.6 ± 1.9 (1, 7.8) | 1.8 ± 1.0 (1.0, 4.2) | 2.5 ± 0.8 (1, 4) |
|  | Grapiprant | 16 | 3.7 ± 2.3 (0, 8) | 2.8 ± 1.4 (1.2, 5.8) | 1.8 ± 1.0 (1.0, 4.3) | 2.4 ± 0.8 (1, 3) |
| Day 42 | Bedinvetmab | 16 | 3.3 ± 2.0 (0, 7) | 2.6 ± 1.7 (1, 7.8) | 1.8 ± 1.5 (1.0, 7.2) | 2.3 ± 0.6 (1, 3) |
|  | Grapiprant | 16 | 3.3 ± 2.4 (0, 8) | 2.2 ± 0.9 (1, 4.8) | 1.6 ± 0.8 (1.0, 4.2) | 2.5 ± 0.6 (1, 3) |
| Day 56 | Bedinvetmab | 15 | 2.7 ± 2.1 (0, 8) | 2.2 ± 1.6 (1, 7.6) | 1.7 ±1.6 (1.0, 7.5) | 2.5 ± 0.6 (1, 3) |
|  | Grapiprant | 14 | 3.4 ± 2.3 (1, 9) | 2.2 ± 1.0 (1, 5.4) | 1.5 ± 0.8 (1.0, 3.7) | 2.2 ± 1.0 (0, 3) |

CBPI: Canine Brief Pain Inventory, PAA: Pain Severity Score, PIS: Pain Interference Score, QOL: Quality of Life, CSOM: Client Specific Outcome Measures, SNoRE: Sleep and Nighttime Restlessness Evaluation

Supplementary file 2. Mean change from baseline ± SD (range) of each outcome measure at each timepoint

| Time point | Group | n | Lameness Index | CBPI PSS | CBPI PIS | CBPI QOL |
| --- | --- | --- | --- | --- | --- | --- |
| Day 14 | Bedinvetmab | 16 | -0.6 ± 0.4 (-1.2, 0) | -1.5 ± 1.3 (-4.8, 0.8) | -1.9 ± 1.6 (-5.8, 0) | 0.6 ± 0.6 (0, 2) |
|  | Grapiprant | 15 | -0.2 ± 0.5 (-1.4, 0.4) | -0.9 ± 1.5 (-4.0, 2.0) | -1.1 ± 1.9 (-4.5, 1) | 0.3 ± 0.6 (0, 2) |
| Day 28 | Bedinvetmab | 16 | -0.8 ± 0.5 (-1.6, 0) | -1.8 ± 1.4 (-5.8, 1.0) | -2.6 ± 1.8 (-6.2, -0.2) | 0.9 ± 0.7 (0, 3) |
|  | Grapiprant | 16 | -0.5 ± 0.6 (-2.0, 0.2) | -1.5 ± 1.3 (-3.8, 0.5) | -1.7 ± 2.2 (-5.5, 1.3) | 0.2 ± 0.8 (-1, 2) |
| Day 42 | Bedinvetmab | 16 | -0.9 ± 0.6 (-1.8, 0) | -2.1 ± 1.7 (-6.5, 0.5) | -2.5 ± 2.0 (-6.8, 0.2) | 1.0 ± 0.8 (0, 3) |
|  | Grapiprant | 16 | -0.6 ± 0.7 (-2.0, 0.4) | -1.5 ± 1.7 (-5.0, 1.0) | -1.8 ± 2.3 (-6.0, 1.7) | 0.3 ± 0.9 (-1, 2) |
| Day 56 | Bedinvetmab | 15 | -1.0 ± 0.6 (-2.2, 0) | -2.5 ± 1.8 (-6.0, 0) | -2.8 ± 2.2 (-6.5, 0.3) | 0.9 ± 1.0 (-1, 2) |
|  | Grapiprant | 14 | -0.6 ± 0.7 (-2.0, 0.4) | -1.7 ± 1.6 (-5.0, 0.5) | -2.0 ± 2.4 (-6.0,2.2) | 0.6 ± 1.0 (-1, 2) |

| Time point | Group | n | CSOM | SNoRE 2.0 | SNoRE 3.0 | Joint pain |
| --- | --- | --- | --- | --- | --- | --- |
| Day 14 | Bedinvetmab | 16 | -1.9 ± 2.1 (-6, 1) | -1.2 ± 1.3 (-3.4, 0.8) | -0.91 ± 1.24 (-4.8, 0.33) | -0.25 ± 0.45 (-1, 0) |
|  | Grapiprant | 15 | -1.1 ± 1.8 (-4, 2) | -0.9 ± 1.4 (-3.6, 1.0) | -0.23 ± 0.63 (-1.5, 0.67) | -0.27 ± 0.59 (-1, 1) |
| Day 28 | Bedinvetmab | 16 | -2.8 ± 1.9 (-6, 1) | -1.7 ± 1.6 (-6.0, 0.2) | -1.13 ± 1.42 (-4.8, 0.67) | -0.19 ± 0.66 (-1, 1) |
|  | Grapiprant | 16 | -2.3 ± 2.1 (-6, 2) | -1.0 ± 1.6 (-3.0, 1.8) | 0 ± 0.86 (-1.7, 1.7) | -0.25 ± 0.58 (-1, 1) |
| Day 42 | Bedinvetmab | 16 | -2.6 ± 2.9 (-7, 3) | -1.8 ± 1.6 (-4.8, 0) | -1.10 ± 1.38 (-4.5, 0.67) | -0.38 ± 0.62 (-2, 0) |
|  | Grapiprant | 16 | -2.7 ± 2.3 (-6, 1) | -1.5 ± 1.4 (-4.6, 0.8) | -0.19 ± 0.47 (-1.3, 0.50) | -0.13 ± 0.62 (-1, 1) |
| Day 56 | Bedinvetmab | 15 | -3.1 ± 3.1 (-8, 3) | -1.9 ± 1.9 (-6.4, 0) | -0.99 ± 1.21 (-4.7, 0.17) | -0.20 ± 0.41 (-1, 0) |
|  | Grapiprant | 14 | -2.5 ± 2.1 (-6, 2) | -1.6 ± 1.7 (-5.2, 0.8) | -0.33 ± 0.71 (-1.8, 0.83) | -0.43 ± 0.76 (-2, 1) |

Supplementary file 3. Summary of CBPI Success (excluding dogs that had a PSS/PIS score of < 2 at Day 0). x=number of patients responded positively. y=total number of patients.

| Time point | Group | CBPI PSS Successes  x/y (%) | CBPI PIS Successes  x/y (%) | CBPI Overall Successes  x/y (%) |
| --- | --- | --- | --- | --- |
| 14 | Bedinvetmab | 12/14 (85.7%) | 6/13 (46.1%) | 5/13 (38.5%) |
|  | Grapiprant | 7/12 (58.3%) | 4/12 (33.3%) | 3/12 (25.0%) |
| 28 | Bedinvetmab | 14/14 (100%) | 8/13 (61.5%) | 8/13 (61.5%) |
|  | Grapiprant | 10/13 (76.9%) | 6/13 (46.1%) | 5/13 (38.4%) |
| 42 | Bedinvetmab | 13/14 (92.8%) | 9/13 (69.2%) | 8/13 (61.5%) |
|  | Grapiprant | 10/13 (76.9%) | 6/13 (46.2%) | 6/13 (46.2%) |
| 56 | Bedinvetmab | 12/13 (92.3%) | 8/12 (66.6%) | 8/12 (66.6%) |
|  | Grapiprant | 9/11 (81.8%) | 6/11 (54.5%) | 6/11 (54.5%) |

Supplementary file 4. Mean ± SD (range) of Patient Global Impression of Change (PGIC). n= number of patients.

| Time point | Group | n | PGIC |
| --- | --- | --- | --- |
| 14 | Bedinvetmab | 16 | 2.7 ± 1.0 (1, 5) |
|  | Grapiprant | 15 | 3.3 ± 1.0 (1, 5) |
| 28 | Bedinvetmab | 16 | 2.2 ± 1.1 (1, 5) |
|  | Grapiprant | 16 | 2.7 ± 1.1 (1, 5) |
| 42 | Bedinvetmab | 16 | 2.3 ± 1.2 (1, 5) |
|  | Grapiprant | 16 | 2.7 ± 1.3 (1, 5) |
| 56 | Bedinvetmab | 15 | 1.9 ± 1.3 (1, 5) |
|  | Grapiprant | 14 | 2.4 ± 1.2 (1, 5) |

“Very much improved (1)”, “Much improved (2)”, “Minimally improved (3)”, “No change (4)”, “Minimally worse (5),” Much worse (6)” and “Very much worse (7)”.

Supplementary file 5. Mean ± SD (range) of static body weight distribution on the affected limb. n= number of patients.

| Time point | Group | n | Percent of body weight |
| --- | --- | --- | --- |
| 0 | Bedinvetmab | 14 | 14.38 ± 5.33 (5.59, 21.14) |
|  | Grapiprant | 15 | 13.39 ± 5.98 (2.27, 23.51) |
| 28 | Bedinvetmab | 15 | 14.04 ± 3.92 (7.81, 22.11) |
|  | Grapiprant | 16 | 13.77 ± 4.69 (5.17, 22.51) |
| 56 | Bedinvetmab | 14 | 16.95 ± 4.10 (10.54, 22.9) |
|  | Grapiprant | 9 | 15.7 ± 3.83 (11.53, 22.04) |

*** Please note that the pressure-sensitive walkway (PSW) experienced malfunctions during the study, resulting in the exclusion of a substantial amount of data from the analysis, particularly in the grapiprant group.

Supplementary file 6. Mean ± SD (range) of phosphorus (reference range: 2.6-5.3 mg/dL) at each time point. n= number of patients.

| Time point | Group | n | mg/dL |
| --- | --- | --- | --- |
| 0 | Bedinvetmab | 16 | 4.3 ± 0.9 (3.2-5.9) |
|  | Grapiprant | 15 | 4.2 ± 0.8 (2.4-4.4) |
| 28 | Bedinvetmab | 16 | 3.6 ± 0.7 (2.4-4.7) |
|  | Grapiprant | 16 | 3.2 ± 0.7 (2.4-4.4) |
| 56 | Bedinvetmab | 15 | 3.5 ± 0.7 (2.5-4.8) |
|  | Grapiprant | 14 | 3.4 ± 0.6 (2.4-4.4) |
